# Supplementary material
Source: PubMed Central journal article supplement (PMC6360954)
Supplement: NIHMS999769-supplement-Supplemental_Information.pdf [file NIHMS999769-supplement-Supplemental_Information.pdf]

## **Supplemental Information**

### **Microtubule Dynamics Scale with Cell Size to Set Spindle Length and Assembly Timing**

Benjamin Lacroix, Gaëlle Letort, Laras Pitayu, Jérémy Sallé, Marine Stefanutti, Gilliane Maton, Anne-Marie Ladouceur, Julie C. Canman, Paul S. Maddox, Amy S. Maddox, Nicolas Minc, François Nédélec & Julien Dumont

**Figure S1**

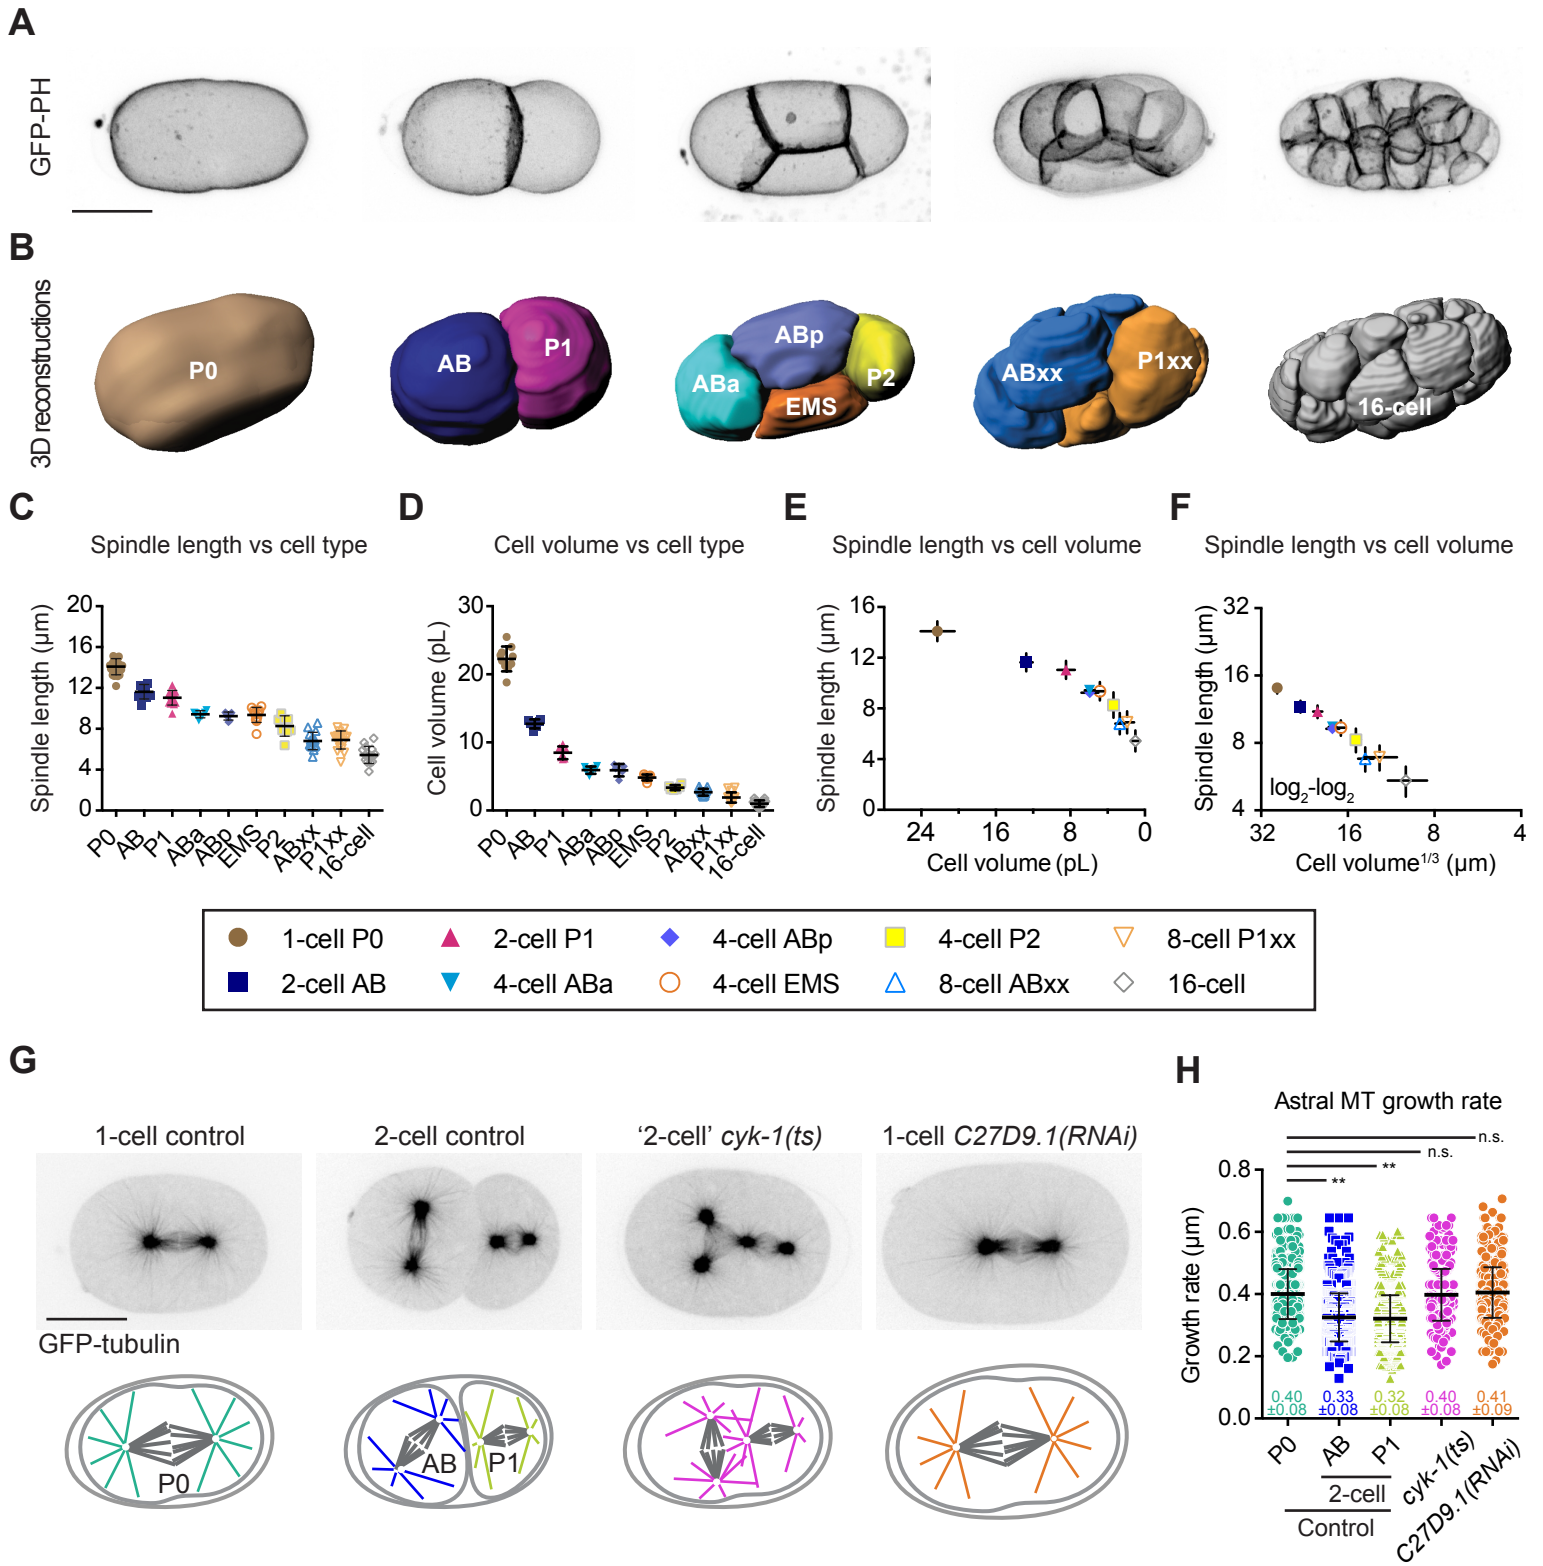

**Figure S1. Allometric Relationship Between Spindle Length and Cell Volume in the *C. elegans* Embryo. Related to Figure 1 and 2**

(A) Still frames from live 2-photon imaging of *C. elegans* embryos expressing a GFP-tagged plasma membrane probe (Pleckstrin Homology (PH) domain) during the first five embryonic divisions (1- to 16-cell stage). Images correspond to maximal projections of z-stacks covering the entire thickness of the embryo. Scale bar, 20  $\mu\text{m}$ .

(B) 3D surface reconstructions from live 2-photon imaging of *C. elegans* embryos expressing a GFP-tagged plasma membrane probe (PH domain) during the first five embryonic divisions (1- to 16-cell stage). Blastomere names are indicated except for the 16-cell stage. At the 8-cell stage, progeny of AB and P1 were grouped together as ABxx and P1xx respectively.

(C) Spindle length at anaphase onset in the different blastomeres during the first five embryonic divisions (1- to 16-cell stage). Each dot corresponds to an individual spindle. (Horizontal bars, mean; error bars, SD;  $n \geq 6$  per type of blastomere).

(D) Cell volume of the different blastomeres during the first five embryonic divisions (1- to 16-cell stage). Each dot corresponds to an individual blastomere. (Horizontal bars, means; error bars, SD;  $n \geq 6$  per type of blastomere).

(E) Average spindle length plotted over the average cell volume for the different blastomeres. (Error bars, SD).

(F) Mean spindle length plotted over the cube root of the average cell volume on a  $\log_2$ - $\log_2$  scale for the different blastomeres indicated on the left. (Error bars, SD).

(G) From left to right, still images from confocal live imaging of a *C. elegans* control one-cell embryo, a control 2-cell embryo, a thermosensitive (ts) mutant embryo of the formin *cyk-1* at the '2-cell' stage after P0 cytokinesis failure, and an abnormally large *C27D9.1(RNAi)*-treated embryo. All express GFP-tagged  $\beta$ -tubulin. Corresponding schematics with color-coding for astral microtubules in different conditions shown at the bottom. Scale bar, 20  $\mu\text{m}$ .

(H) Astral microtubule growth rates were measured at 25°C (restrictive temperature for the *cyk-1(ts)* mutant) for the indicated conditions. Color-coding for the different conditions corresponds to the schematics in (G). (Error bars, SD; one-way ANOVA with Dunnett's multiple comparisons test, \*\*:  $p \leq 0.01$ , n.s.:  $p > 0.05$ ).

**Figure S2**

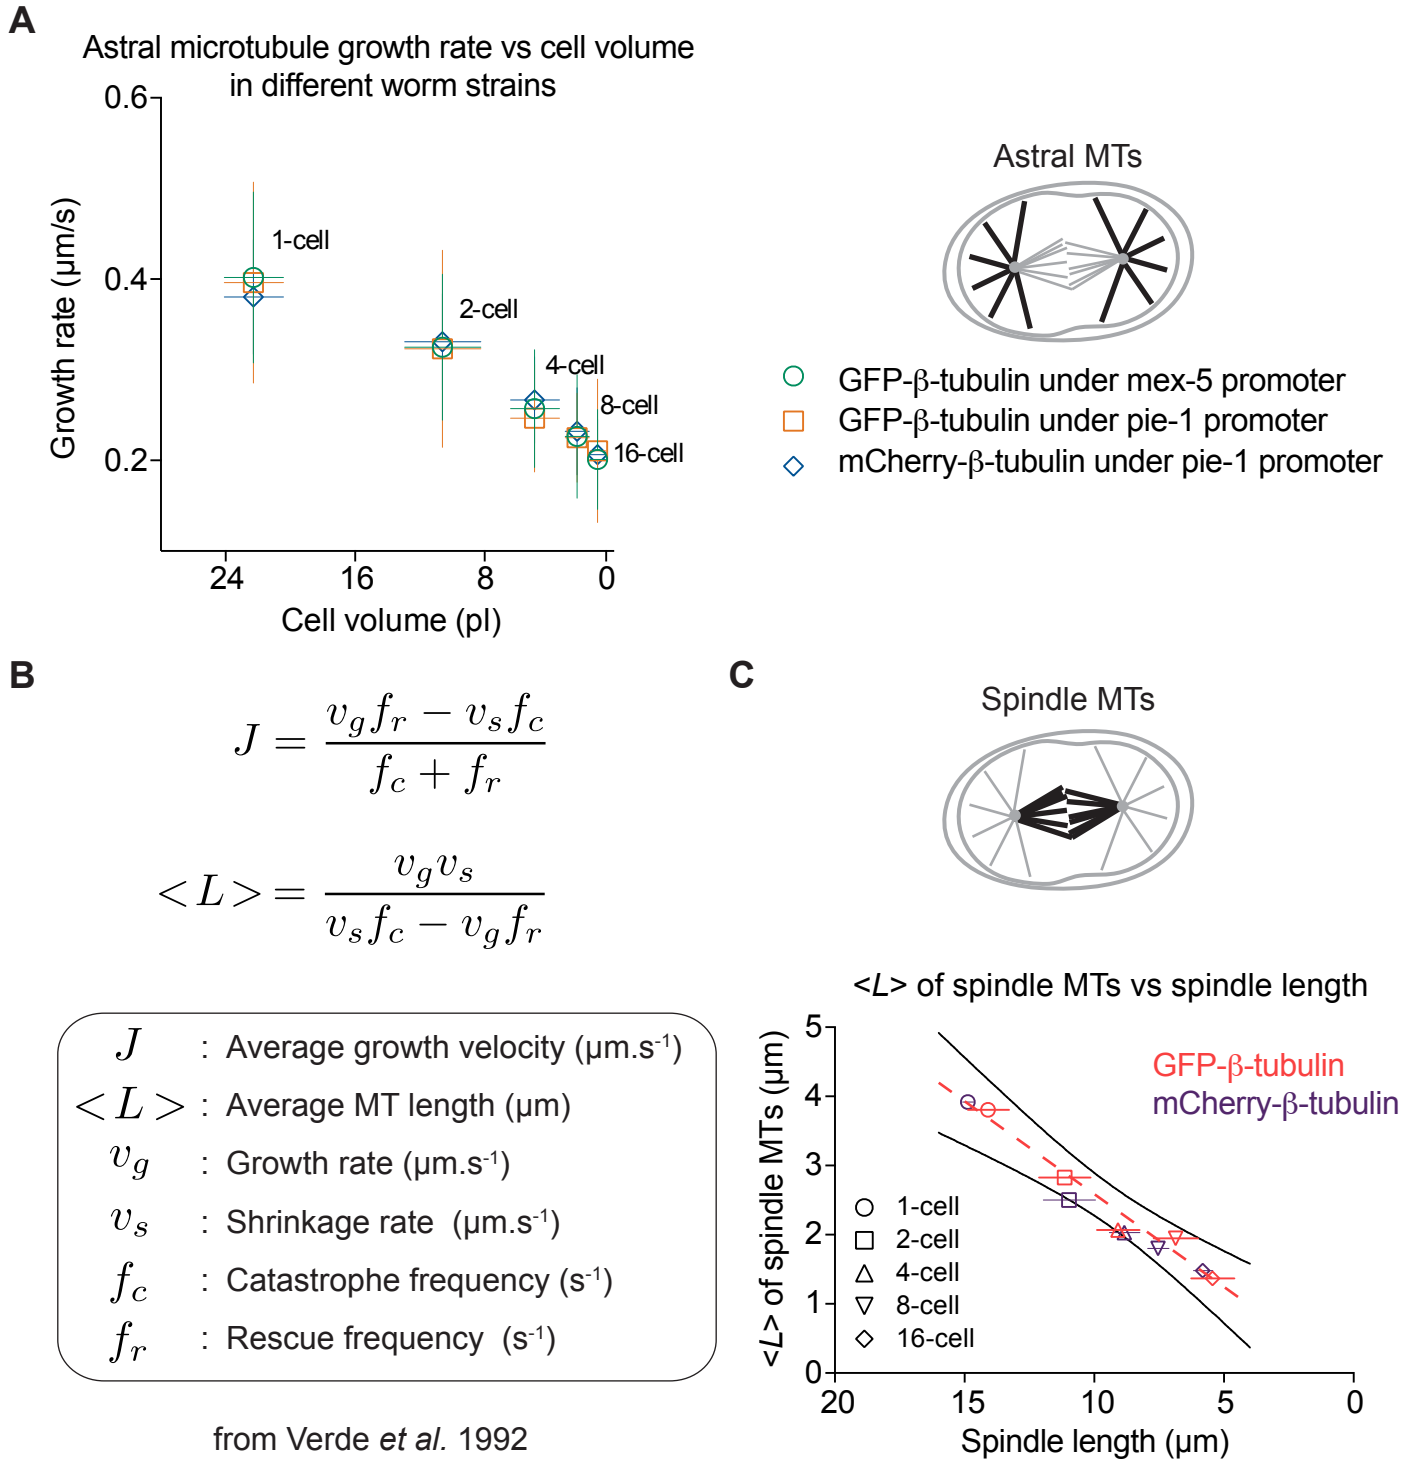

**Figure S2. Fluorescent Protein Tags and/or Promoters Used to Drive  $\beta$ -tubulin Expression do not Affect Microtubule Dynamics in the *C. elegans* Embryo. Related to Figures 1 through 3**

(A) Mean astral microtubule growth rate plotted over the average cell volume at each cleavage stage (1- to 16-cell stage) for the different worm strains indicated on the right. Astral microtubule growth rate was measured in three different worm strains during early embryonic development from the 1- to the 16-cell stage. Microtubule growth rate was tracked using GFP-tagged  $\beta$ -tubulin expressed under two different embryonic promoters (*mex-5* or *pie-1*) or using mCherry-tagged  $\beta$ -tubulin (under the *pie-1* promoter). ( $n \geq 6$  per type of blastomere; error bars, SD).

(B) Formulas used for the calculation of  $J$  (estimated average growth velocity of a microtubule population) and  $\langle L \rangle$  (estimated microtubule average length) from (Verde et al., 1992).

(C) Average theoretical microtubule length  $\langle L \rangle$  calculated using the formula in (B) and plotted over the experimentally measured average spindle length in the indicated conditions (GFP-tagged  $\beta$ -tubulin under *mex-5*: red, mCherry-tagged  $\beta$ -tubulin under *pie-1*: purple). Since microtubules were in a bounded state ( $J < 0$ ) under all conditions,  $\langle L \rangle$  could be calculated. Dotted red and black lines are the linear regression curve and 95% confidence interval respectively for the GFP-tagged  $\beta$ -tubulin under the *mex-5* promoter (red) used in main Figures 1 to 3.

# Figure S3

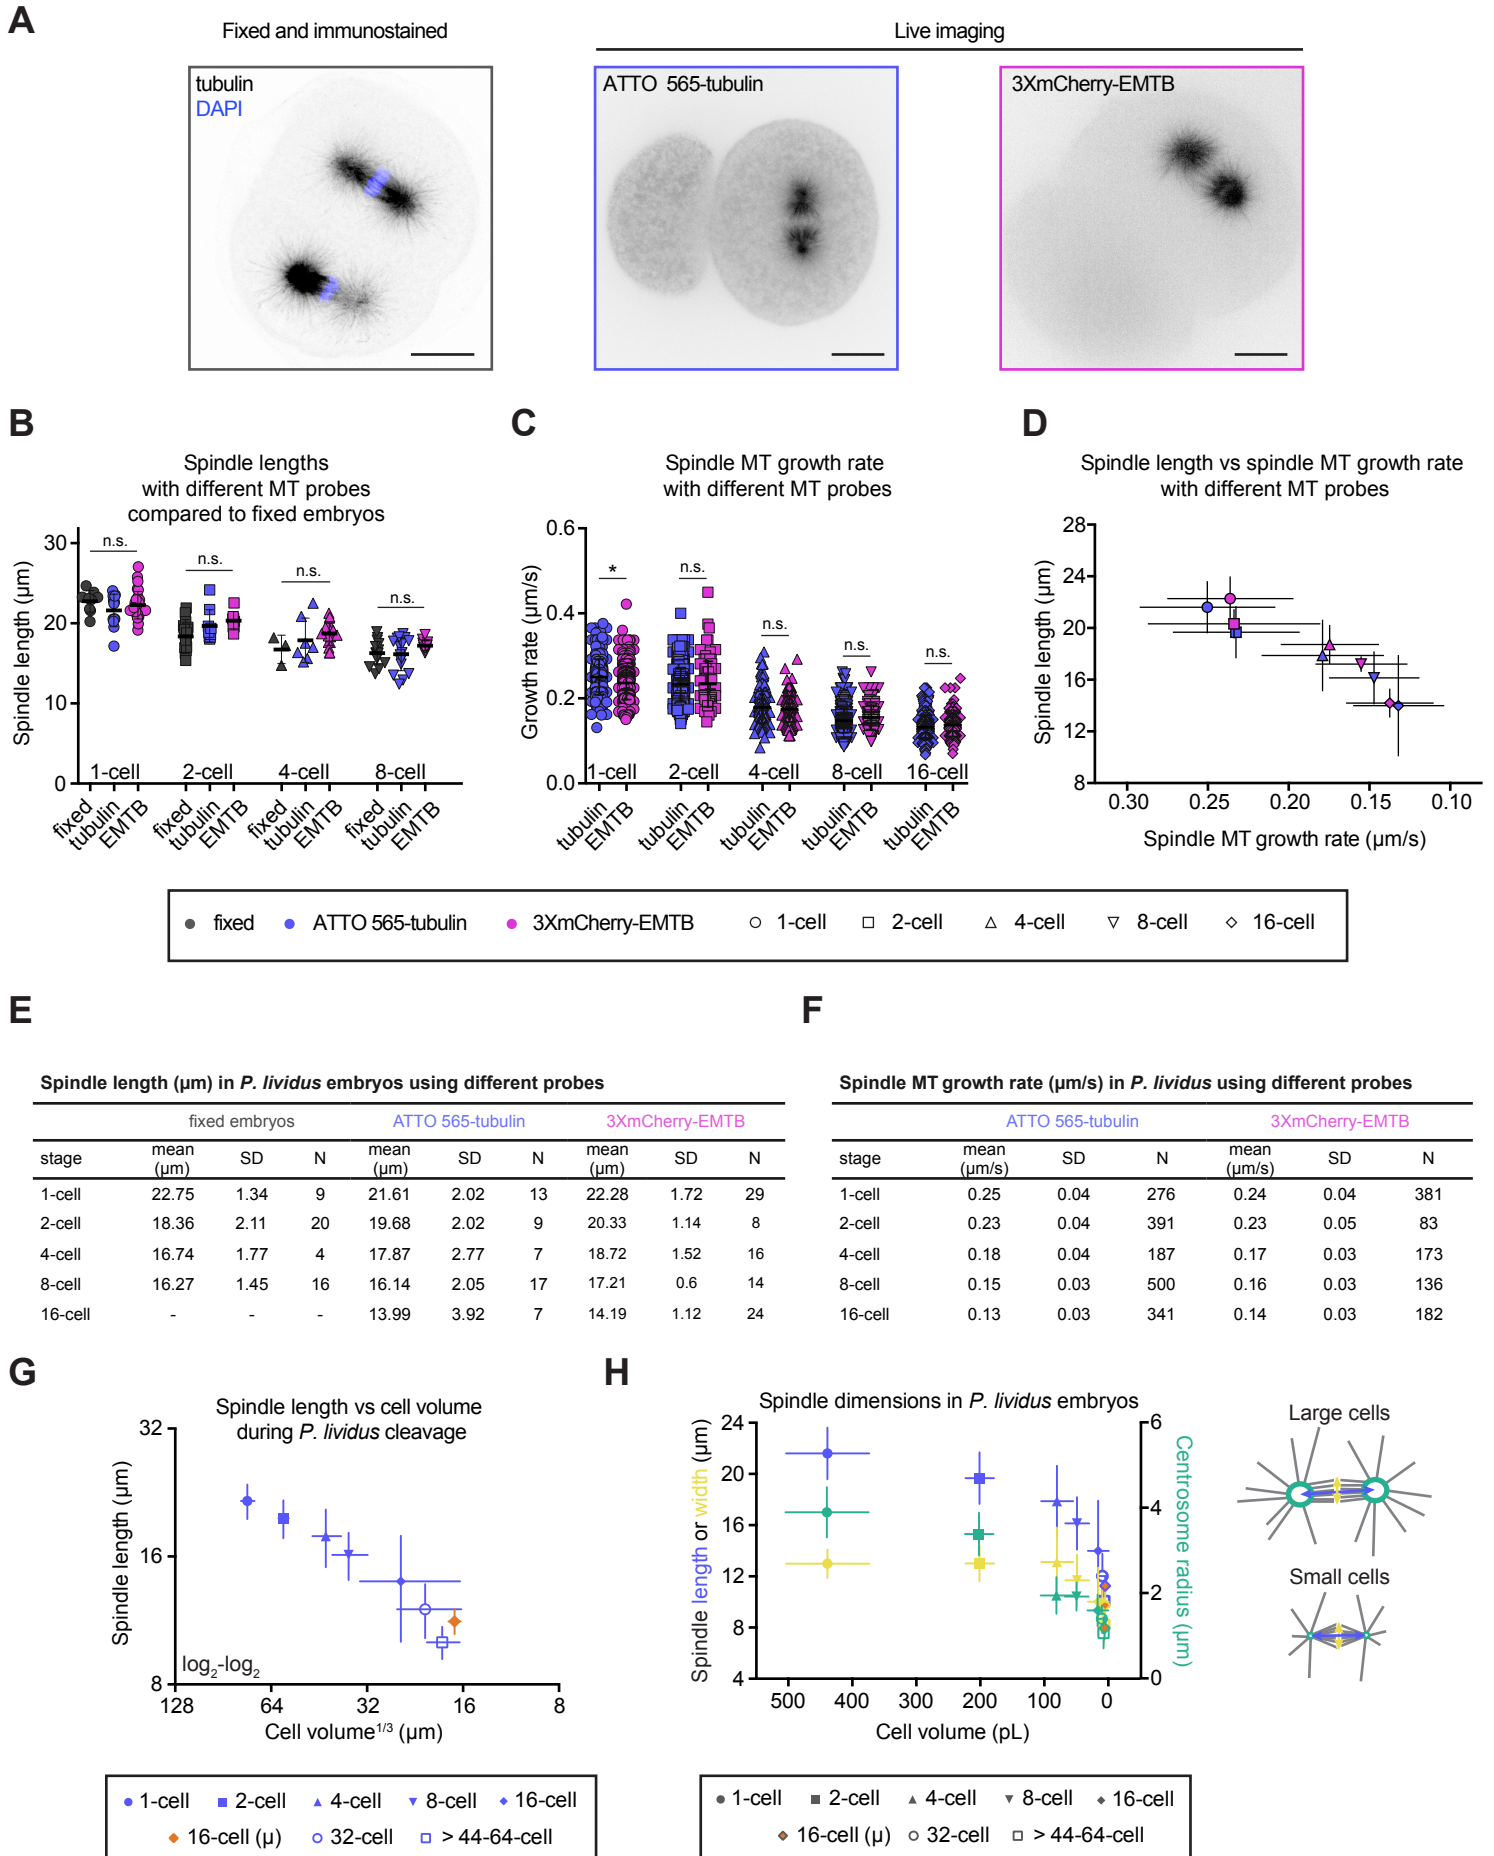

**Figure S3. Probing the Allometric Relationship Between Microtubule Dynamics, Spindle Length/Width and Cell Volume in the *P. lividus* Embryo. Related to Figure 4**

(A) Still images of 2-cell stage *Paracentrotus lividus* embryos with microtubules labeled using different methods. (Left) Fixed embryo with tubulin immunostaining and DAPI-labeled chromosomes. (Center and Right) Still images from live imaging of embryos injected with labeled pig brain tubulin (ATTO 565-tubulin) or the ensconsin microtubule-binding domain (3XmCherry-EMTB).

(B) Comparison of spindle lengths in immunostained embryos (grey), ATTO 565-tubulin injected live embryos (blue) or 3XmCherry-EMTB injected live embryos (magenta) at the indicated stages (Error bars, SD; one-way ANOVA comparison within each stage, n.s.:  $p > 0.05$ ). (n of analyzed spindle  $\geq 4$  per condition).

(C) Spindle microtubule growth rate measured with ATTO 565-tubulin (blue) or 3XmCherry-EMTB (magenta) at the indicated stages. (Error bars, SD; one-way ANOVA with Sidak's multiple comparisons test, \*\*:  $p \leq 0.01$ , n.s.:  $p > 0.05$ ). n(cells/stage)  $\geq 5$ , n(microtubules/stage)  $\geq 55$ .

(D) Average spindle length plotted over the corresponding mean spindle microtubule growth rate in the indicated cleavage stage and conditions (ATTO 565-tubulin in blue, 3XmCherry-EMTB in magenta). Key for the different cleavage stages shown in the bottom box. (Error bars, SD).

(E) Table corresponding to (B). Spindle length from the 1- to the 16-cell stage in *P. lividus* fixed embryos and in ATTO 565-tubulin or 3XmCherry-EMTB injected live embryos.

(F) Table corresponding to (C). Spindle microtubule growth from the 1- to the 16-cell stage in *P. lividus* in ATTO 565-tubulin or 3XmCherry-EMTB injected live embryos.

(G) Mean spindle length in *P. lividus* measured at anaphase onset and plotted over the cube root of the average cell volume for the different blastomeres on a  $\log_2$ - $\log_2$  scale. (Error bars, SD;  $n \geq 5$  per stage).

(H) Mean spindle length (blue) and width (yellow) (left Y-axis) and centrosome radius (green) (right Y-axis) plotted over the corresponding average cell volume for the different stages. (Error bars, SD). A schematic representation of the spindle shape change observed between large and small cells in *P. lividus* embryos shown on the right.

**Figure S4**

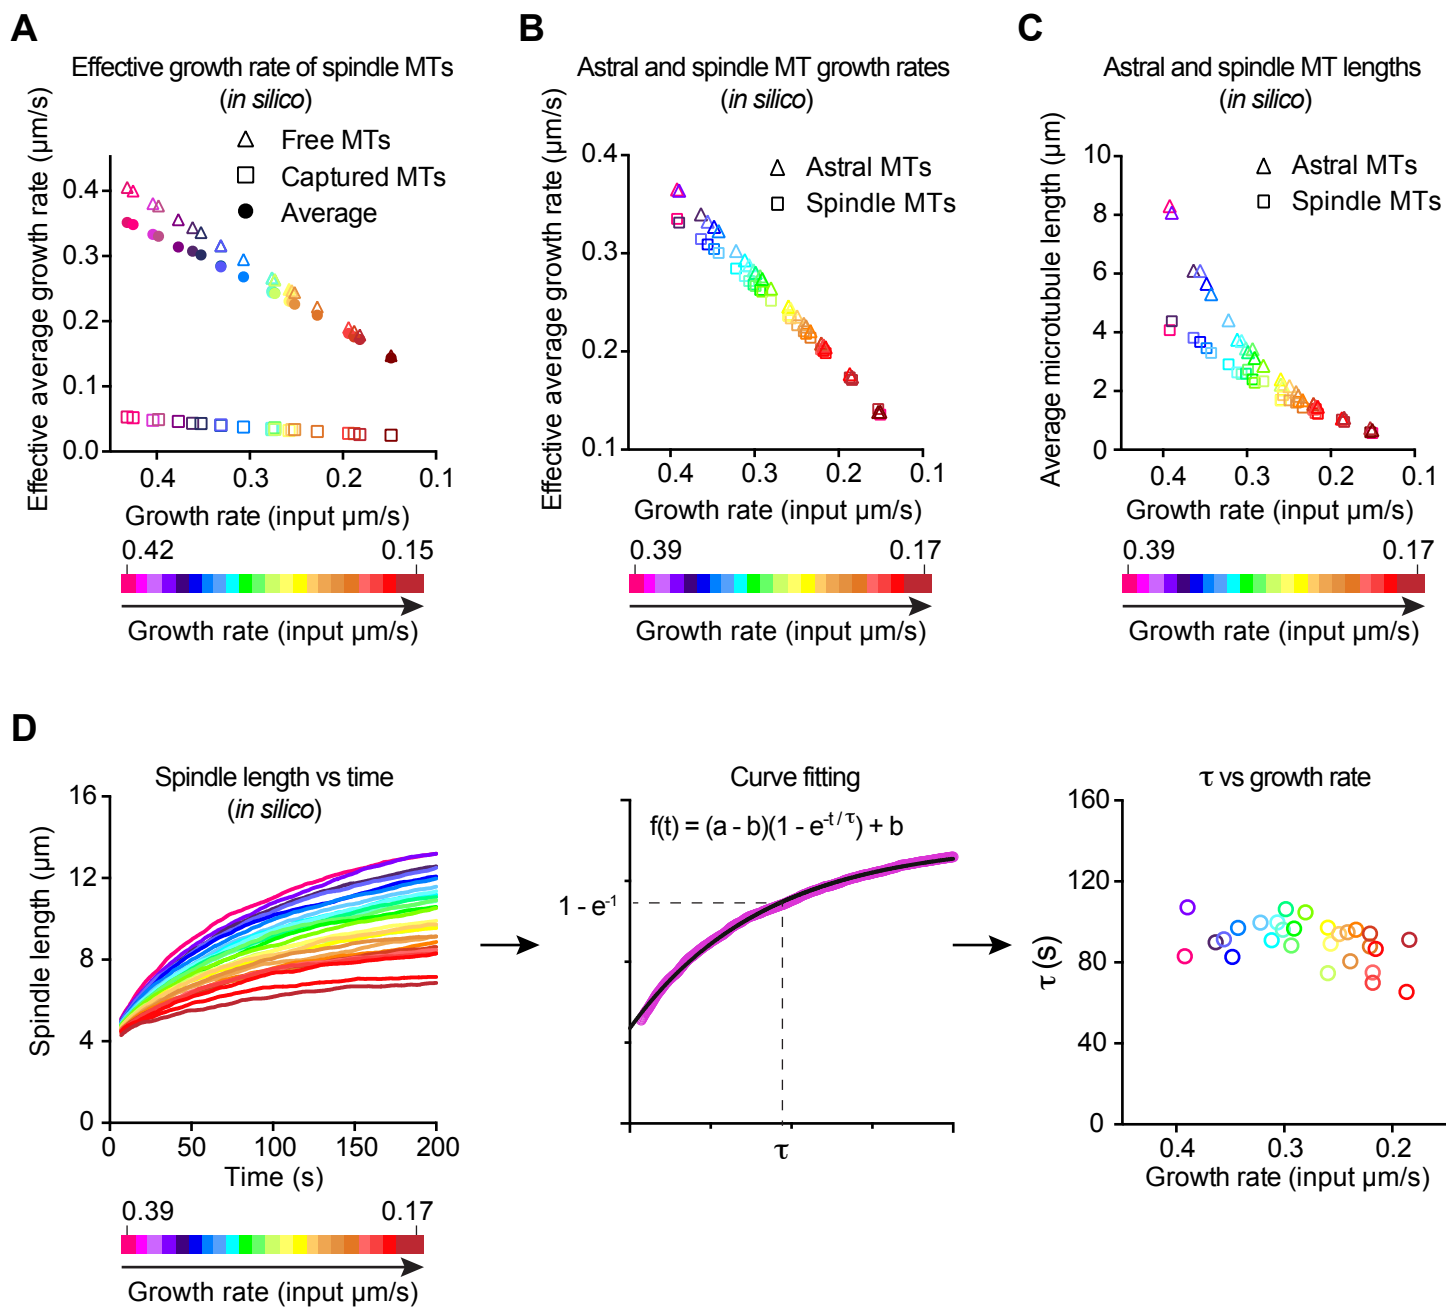



**Figure S4. Microtubule Dynamics and Spindle Assembly Timing in the Computational 3D Simulations. Related to Figure 5**

(A) Simulated effective growth rate of spindle microtubules growing freely in the cytoplasm (triangles), captured at metaphase plate (squares), or the average of both populations (plain circles) plotted over the input growth rate. Color-coding of the input growth rate indicated at the bottom, from magenta (0.42  $\mu\text{m/s}$ ) to dark red (0.15  $\mu\text{m/s}$ ). See Table S3 and Methods for more details.

(B) Simulated effective growth rate of astral (triangles) and spindle (squares) microtubules plotted over the input growth rate. Color-coding of the input growth rate indicated at the bottom, from magenta (0.39  $\mu\text{m/s}$ ) to dark red (0.17  $\mu\text{m/s}$ ).

(C) Simulated average astral (triangles) and spindle (squares) microtubule lengths plotted over the input growth rate. Color-coding is the same as in (B).

(D) Spindle assembly timing is independent of the input microtubule growth rate in the computational 3D simulations. (Left) Simulated spindle length plotted over time at various microtubule growth rates for the simulation shown in Figure 5A. Color-coding of the growth rate indicated at the bottom, from magenta (0.39  $\mu\text{m/s}$ ) to red (0.17  $\mu\text{m/s}$ ). (Center) Example of curve fitting for one input growth rate (0.39  $\mu\text{m/s}$ ). *In silico* data fitted to single exponential functions  $f(t) = (a - b)(1 - e^{-\frac{t}{\tau}}) + b$ , where 'a' corresponds to the plateau, 'b' to the initial spindle length and ' $\tau$ ' to the time constant required to reach ~63% of the maximal amplitude ( $1 - e^{-1}$  when  $t = \tau$ ). (Right) The values of  $\tau$  extracted for each input growth rate and plotted over the input growth rate.

**Figure S5**

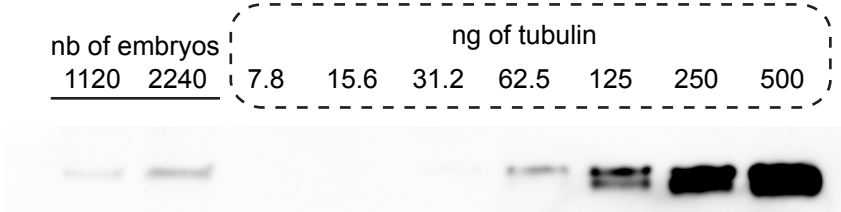

**Figure S5. Quantitative Western Blot for the Estimation of the Tubulin Concentration in Early *C. elegans* Embryos. Related to Figure 8**

Quantitative western blot using an anti- $\alpha$ -tubulin antibody (DM1 $\alpha$ ) on 1- to ~64-cell stage embryo extracts and on increasing amounts of purified pig brain tubulin. Estimations of tubulin quantity and concentration are described in the Methods section.

**Table S1. Microtubule Dynamics Parameters in *C. elegans* Embryos. Related to Figures 1 to 3 and Figure S2**

**A**

**Astral microtubule dynamics in control and RNAi-treated embryos**

| Control                            |         | Growth rate ( $\mu\text{m/s}$ ) |      |      | Shrinkage rate ( $\mu\text{m/s}$ ) |      |      | Catastrophe freq. ( $\text{s}^{-1}$ ) |      |      | Rescue freq. ( $\text{s}^{-1}$ ) |      |      | Cell volume ( $\mu\text{L}$ ) |      |    | Spindle length ( $\mu\text{m}$ ) |      |    | $J$                 | $\langle L \rangle$ |
|------------------------------------|---------|---------------------------------|------|------|------------------------------------|------|------|---------------------------------------|------|------|----------------------------------|------|------|-------------------------------|------|----|----------------------------------|------|----|---------------------|---------------------|
| stage                              | cell    | mean                            | SD   | n    | mean                               | SD   | n    | mean                                  | SD   | n    | mean                             | SD   | n    | mean                          | SD   | n  | mean                             | SD   | n  | ( $\mu\text{m/s}$ ) | ( $\mu\text{m}$ )   |
| 1-cell                             | P0      | 0.4                             | 0.09 | 2080 | 0.71                               | 0.38 | 1129 | 0.19                                  | 0.07 | 2080 | 0.32                             | 0.14 | 1129 | 22.27                         | 1.83 | 10 | 14.09                            | 0.79 | 24 | -0.01               | 31.55               |
| 2-cell                             | All     | 0.32                            | 0.08 | 1320 | 0.62                               | 0.23 | 904  | 0.24                                  | 0.07 | 1320 | 0.39                             | 0.14 | 904  | 10.6                          | 2.35 | 12 | 11.14                            | 0.99 | 23 | -0.03               | 10.58               |
| 2-cell                             | AB      | 0.32                            | 0.08 | 610  | 0.63                               | 0.27 | 411  | 0.22                                  | 0.06 | 610  | 0.38                             | 0.14 | 411  | 12.73                         | 0.66 | 6  | 11.28                            | 1.29 | 10 | -0.02               | 10.94               |
| 2-cell                             | P1      | 0.32                            | 0.08 | 791  | 0.61                               | 0.23 | 545  | 0.24                                  | 0.07 | 791  | 0.41                             | 0.14 | 545  | 8.48                          | 0.93 | 6  | 11.04                            | 0.72 | 13 | -0.02               | 10.41               |
| 4-cell                             | All     | 0.26                            | 0.07 | 2443 | 0.67                               | 0.26 | 1630 | 0.24                                  | 0.08 | 2443 | 0.43                             | 0.21 | 1630 | 4.9                           | 1.52 | 23 | 9.08                             | 0.82 | 33 | -0.07               | 3.47                |
| 4-cell                             | Aba     | 0.26                            | 0.06 | 330  | 0.64                               | 0.22 | 178  | 0.25                                  | 0.08 | 330  | 0.49                             | 0.18 | 178  | 5.93                          | 0.54 | 6  | 9.42                             | 0.36 | 6  | -0.04               | 4.64                |
| 4-cell                             | Abp     | 0.25                            | 0.07 | 385  | 0.67                               | 0.24 | 227  | 0.23                                  | 0.07 | 385  | 0.44                             | 0.23 | 227  | 5.97                          | 1.04 | 5  | 9.25                             | 0.39 | 7  | -0.05               | 4.04                |
| 4-cell                             | EMS     | 0.26                            | 0.07 | 975  | 0.7                                | 0.28 | 634  | 0.25                                  | 0.1  | 975  | 0.51                             | 0.2  | 634  | 4.84                          | 0.44 | 7  | 9.35                             | 0.46 | 12 | -0.04               | 4.74                |
| 4-cell                             | P2      | 0.25                            | 0.06 | 754  | 0.68                               | 0.34 | 596  | 0.23                                  | 0.09 | 754  | 0.37                             | 0.19 | 596  | 3.37                          | 0.38 | 6  | 8.27                             | 1.00 | 7  | -0.07               | 2.63                |
| 8-cell                             | All     | 0.23                            | 0.07 | 1647 | 0.57                               | 0.22 | 1103 | 0.29                                  | 0.10 | 1647 | 0.47                             | 0.18 | 1103 | 2.29                          | 0.74 | 27 | 6.86                             | 0.85 | 34 | -0.07               | 2.31                |
| 8-cell                             | Abxx    | 0.23                            | 0.07 | 1367 | 0.56                               | 0.23 | 892  | 0.3                                   | 0.1  | 1367 | 0.48                             | 0.19 | 892  | 2.69                          | 0.5  | 13 | 6.81                             | 0.85 | 16 | -0.07               | 2.08                |
| 8-cell                             | P1xx    | 0.22                            | 0.06 | 653  | 0.57                               | 0.25 | 469  | 0.27                                  | 0.09 | 653  | 0.47                             | 0.17 | 469  | 1.91                          | 0.74 | 14 | 6.91                             | 0.88 | 18 | -0.06               | 2.4                 |
| 16-cell                            | 16-cell | 0.2                             | 0.05 | 639  | 0.51                               | 0.21 | 413  | 0.32                                  | 0.11 | 639  | 0.45                             | 0.18 | 413  | 1.02                          | 0.48 | 18 | 5.44                             | 0.84 | 15 | -0.09               | 1.4                 |
| <i>cls-2<sup>CLASP</sup>(RNAi)</i> |         | mean                            | SD   | n    | mean                               | SD   | n    | mean                                  | SD   | n    | mean                             | SD   | n    | mean                          | SD   | n  | mean                             | SD   | n  | ( $\mu\text{m/s}$ ) | ( $\mu\text{m}$ )   |
| 1-cell                             | P0      | 0.3                             | 0.06 | 321  | 0.6                                | 0.18 | 272  | 0.23                                  | 0.06 | 321  | 0.35                             | 0.14 | 272  | -                             | -    | -  | 8.97                             | 0.94 | 8  | -0.04               | 5.40                |
| <i>C27D9.1(RNAi)</i>               |         | mean                            | SD   | n    | mean                               | SD   | n    | mean                                  | SD   | n    | mean                             | SD   | n    | mean                          | SD   | n  | mean                             | SD   | n  | ( $\mu\text{m/s}$ ) | ( $\mu\text{m}$ )   |
| 1-cell                             | P0      | 0.41                            | 0.08 | 740  | 0.65                               | 0.2  | 552  | 0.2                                   | 0.06 | 740  | 0.3                              | 0.1  | 552  | -                             | -    | -  | 18.41                            | 1.01 | 17 | -0.008              | 39.55               |

**Spindle microtubule dynamics in control and RNAi-treated embryos**

| Control                            |         | Growth rate ( $\mu\text{m/s}$ ) |      |      | Shrinkage rate ( $\mu\text{m/s}$ ) |      |     | Catastrophe freq. ( $\text{s}^{-1}$ ) |      |      | Rescue freq. ( $\text{s}^{-1}$ ) |      |     | Cell volume ( $\mu\text{L}$ ) |      |    | Spindle length ( $\mu\text{m}$ ) |      |    | $J$                 | $\langle L \rangle$ |
|------------------------------------|---------|---------------------------------|------|------|------------------------------------|------|-----|---------------------------------------|------|------|----------------------------------|------|-----|-------------------------------|------|----|----------------------------------|------|----|---------------------|---------------------|
| stage                              | cell    | mean                            | SD   | n    | mean                               | SD   | n   | mean                                  | SD   | n    | mean                             | SD   | n   | mean                          | SD   | n  | mean                             | SD   | n  | ( $\mu\text{m/s}$ ) | ( $\mu\text{m}$ )   |
| 1-cell                             | P0      | 0.3                             | 0.07 | 1021 | 0.65                               | 0.26 | 743 | 0.28                                  | 0.1  | 1021 | 0.44                             | 0.18 | 743 | 22.27                         | 1.83 | 10 | 14.09                            | 0.79 | 24 | -0.05               | 3.89                |
| 2-cell                             | All     | 0.26                            | 0.06 | 1059 | 0.72                               | 0.34 | 679 | 0.36                                  | 0.10 | 1059 | 0.70                             | 0.29 | 679 | 10.6                          | 2.35 | 12 | 11.14                            | 0.99 | 23 | -0.07               | 2.48                |
| 2-cell                             | AB      | 0.27                            | 0.05 | 355  | 0.75                               | 0.36 | 246 | 0.34                                  | 0.09 | 355  | 0.65                             | 0.28 | 246 | 12.73                         | 0.66 | 6  | 11.28                            | 1.29 | 10 | -0.07               | 2.63                |
| 2-cell                             | P1      | 0.26                            | 0.06 | 704  | 0.71                               | 0.33 | 433 | 0.37                                  | 0.1  | 704  | 0.72                             | 0.3  | 433 | 8.48                          | 0.93 | 6  | 11.04                            | 0.72 | 13 | -0.07               | 2.44                |
| 4-cell                             | All     | 0.21                            | 0.05 | 625  | 0.66                               | 0.30 | 405 | 0.34                                  | 0.09 | 625  | 0.72                             | 0.29 | 405 | 4.9                           | 1.52 | 23 | 9.08                             | 0.82 | 33 | -0.07               | 2.01                |
| 4-cell                             | Aba     | 0.22                            | 0.04 | 47   | 0.54                               | 0.17 | 43  | 0.31                                  | 0.07 | 47   | 0.62                             | 0.18 | 43  | 5.93                          | 0.54 | 6  | 9.42                             | 0.36 | 6  | -0.04               | 3.98                |
| 4-cell                             | Abp     | 0.22                            | 0.05 | 62   | 0.51                               | 0.13 | 53  | 0.32                                  | 0.07 | 62   | 0.6                              | 0.16 | 53  | 5.97                          | 1.04 | 5  | 9.25                             | 0.39 | 7  | -0.04               | 3.42                |
| 4-cell                             | EMS     | 0.22                            | 0.05 | 359  | 0.69                               | 0.31 | 226 | 0.34                                  | 0.1  | 359  | 0.78                             | 0.33 | 226 | 4.84                          | 0.44 | 7  | 9.35                             | 0.46 | 12 | -0.07               | 2.12                |
| 4-cell                             | P2      | 0.2                             | 0.05 | 173  | 0.69                               | 0.33 | 99  | 0.34                                  | 0.08 | 173  | 0.73                             | 0.29 | 99  | 3.37                          | 0.38 | 6  | 8.27                             | 1.00 | 7  | -0.09               | 1.57                |
| 8-cell                             | All     | 0.20                            | 0.04 | 909  | 0.59                               | 0.24 | 555 | 0.31                                  | 0.11 | 909  | 0.60                             | 0.26 | 555 | 2.29                          | 0.74 | 27 | 6.86                             | 0.85 | 34 | -0.07               | 1.78                |
| 8-cell                             | Abxx    | 0.2                             | 0.04 | 247  | 0.54                               | 0.21 | 173 | 0.28                                  | 0.09 | 247  | 0.52                             | 0.19 | 173 | 2.69                          | 0.5  | 13 | 6.81                             | 0.85 | 16 | -0.06               | 2                   |
| 8-cell                             | P1xx    | 0.2                             | 0.04 | 662  | 0.61                               | 0.25 | 382 | 0.32                                  | 0.12 | 662  | 0.64                             | 0.29 | 382 | 1.91                          | 0.74 | 14 | 6.91                             | 0.88 | 18 | -0.07               | 1.74                |
| 16-cell                            | 16-cell | 0.17                            | 0.05 | 422  | 0.65                               | 0.31 | 288 | 0.33                                  | 0.1  | 422  | 0.77                             | 0.29 | 288 | 1.02                          | 0.48 | 18 | 5.44                             | 0.84 | 15 | -0.08               | 1.46                |
| <i>cls-2<sup>CLASP</sup>(RNAi)</i> |         | mean                            | SD   | n    | mean                               | SD   | n   | mean                                  | SD   | n    | mean                             | SD   | n   | mean                          | SD   | n  | mean                             | SD   | n  | ( $\mu\text{m/s}$ ) | ( $\mu\text{m}$ )   |
| 1-cell                             | P0      | 0.25                            | 0.06 | 556  | 0.63                               | 0.20 | 458 | 0.33                                  | 0.12 | 556  | 0.52                             | 0.22 | 458 | -                             | -    | -  | 8.97                             | 0.94 | 8  | -0.08               | 2.02                |
| <i>C27D9.1(RNAi)</i>               |         | mean                            | SD   | n    | mean                               | SD   | n   | mean                                  | SD   | n    | mean                             | SD   | n   | mean                          | SD   | n  | mean                             | SD   | n  | ( $\mu\text{m/s}$ ) | ( $\mu\text{m}$ )   |
| 1-cell                             | P0      | 0.38                            | 0.08 | 772  | 0.65                               | 0.16 | 758 | 0.27                                  | 0.07 | 772  | 0.35                             | 0.03 | 758 | -                             | -    | -  | 18.41                            | 1.01 | 17 | -0.07               | 5.78                |

**B**

**Astral microtubule growth rates in different *C. elegans* strains**

|         | mex-5p>GFP- $\beta$ -tubulin |      |      | pie-1p>GFP- $\beta$ -tubulin |      |     | pie-1p>mCherry- $\beta$ -tubulin |      |     |
|---------|------------------------------|------|------|------------------------------|------|-----|----------------------------------|------|-----|
|         | mean                         | SD   | n    | mean                         | SD   | n   | mean                             | SD   | n   |
| 1-cell  | 0.40                         | 0.09 | 2080 | 0.40                         | 0.11 | 295 | 0.38                             | 0.06 | 321 |
| 2-cell  | 0.32                         | 0.08 | 1320 | 0.32                         | 0.11 | 188 | 0.33                             | 0.05 | 333 |
| 4-cell  | 0.26                         | 0.07 | 2443 | 0.25                         | 0.06 | 234 | 0.27                             | 0.05 | 442 |
| 8-cell  | 0.23                         | 0.07 | 1647 | 0.23                         | 0.05 | 197 | 0.23                             | 0.05 | 378 |
| 16-cell | 0.20                         | 0.05 | 639  | 0.21                         | 0.08 | 114 | 0.21                             | 0.04 | 295 |

**C**

**Spindle microtubule dynamics in different *C. elegans* strains**

|                                                     | Growth rate ( $\mu\text{m/s}$ ) |      |      | Shrinkage rate ( $\mu\text{m/s}$ ) |      |     | Catastrophe frequency ( $\text{s}^{-1}$ ) |      |      | Rescue frequency ( $\text{s}^{-1}$ ) |      |     | $J$             | $\langle L \rangle$ |
|-----------------------------------------------------|---------------------------------|------|------|------------------------------------|------|-----|-------------------------------------------|------|------|--------------------------------------|------|-----|-----------------|---------------------|
|                                                     | mean                            | SD   | n    | mean                               | SD   | n   | mean                                      | SD   | n    | mean                                 | SD   | n   | $\mu\text{m/s}$ | $\mu\text{m}$       |
| <b>mex-5p&gt;GFP-<math>\beta</math>-tubulin</b>     |                                 |      |      |                                    |      |     |                                           |      |      |                                      |      |     |                 |                     |
| 1 cell                                              | 0.30                            | 0.07 | 1021 | 0.65                               | 0.26 | 743 | 0.28                                      | 0.10 | 1021 | 0.44                                 | 0.18 | 743 | -0.05           | 3.89                |
| 2 cells                                             | 0.26                            | 0.06 | 1059 | 0.72                               | 0.34 | 679 | 0.36                                      | 0.10 | 1021 | 0.70                                 | 0.29 | 679 | -0.07           | 2.48                |
| 4 cells                                             | 0.21                            | 0.05 | 625  | 0.66                               | 0.30 | 405 | 0.34                                      | 0.09 | 625  | 0.72                                 | 0.29 | 405 | -0.07           | 2.01                |
| 8 cells                                             | 0.20                            | 0.04 | 909  | 0.59                               | 0.24 | 555 | 0.31                                      | 0.11 | 909  | 0.60                                 | 0.26 | 555 | -0.07           | 1.78                |
| 16 cells                                            | 0.17                            | 0.05 | 422  | 0.65                               | 0.31 | 288 | 0.33                                      | 0.10 | 422  | 0.77                                 | 0.29 | 288 | -0.08           | 1.46                |
| <b>pie-1p&gt;mCherry-<math>\beta</math>-tubulin</b> |                                 |      |      |                                    |      |     |                                           |      |      |                                      |      |     |                 |                     |
| 1 cell                                              | 0.29                            | 0.04 | 171  | 0.65                               | 0.15 | 183 | 0.25                                      | 0.04 | 171  | 0.40                                 | 0.09 | 183 | -0.05           | 3.78                |
| 2 cells                                             | 0.26                            | 0.04 | 149  | 0.66                               | 0.18 | 119 | 0.32                                      | 0.09 | 149  | 0.58                                 | 0.22 | 119 | -0.06           | 2.80                |
| 4 cells                                             | 0.22                            | 0.04 | 194  | 0.66                               | 0.19 | 144 | 0.35                                      | 0.08 | 194  | 0.73                                 | 0.25 | 144 | -0.07           | 2.04                |
| 8 cells                                             | 0.20                            | 0.04 | 213  | 0.62                               | 0.18 | 123 | 0.32                                      | 0.08 | 213  | 0.68                                 | 0.21 | 123 | -0.07           | 1.92                |
| 16 cells                                            | 0.18                            | 0.03 | 278  | 0.60                               | 0.18 | 266 | 0.32                                      | 0.06 | 278  | 0.63                                 | 0.17 | 266 | -0.09           | 1.35                |

**Table S2. Microtubule Dynamics, Spindle and Cell Dimensions in *Caenorhabditis elegans* and *Paracentrotus lividus*. Related to Figures 4, 5, 8 and S4**

**A**

***C. elegans* and *P. lividus* spindle microtubule dynamics parameters, spindle lengths, and cell volume**

| <b><i>C. elegans</i></b> |                                 |      |      |                                    |      |     |                                       |      |      |                                  |      |     |                                  |      |    |                  |       |    |                     |                   |
|--------------------------|---------------------------------|------|------|------------------------------------|------|-----|---------------------------------------|------|------|----------------------------------|------|-----|----------------------------------|------|----|------------------|-------|----|---------------------|-------------------|
|                          | Growth rate ( $\mu\text{m/s}$ ) |      |      | Shrinkage rate ( $\mu\text{m/s}$ ) |      |     | Catastrophe freq. ( $\text{s}^{-1}$ ) |      |      | Rescue freq. ( $\text{s}^{-1}$ ) |      |     | Spindle length ( $\mu\text{m}$ ) |      |    | Cell volume (pL) |       |    | <i>J</i>            | <L>               |
| stage                    | mean                            | SD   | N    | mean                               | SD   | N   | mean                                  | SD   | N    | mean                             | SD   | N   | mean                             | SD   | N  | mean             | SD    | N  | ( $\mu\text{m/s}$ ) | ( $\mu\text{m}$ ) |
| 1-cell                   | 0.30                            | 0.07 | 1021 | 0.65                               | 0.26 | 743 | 0.28                                  | 0.10 | 1021 | 0.44                             | 0.18 | 743 | 14.09                            | 0.79 | 24 | 22.27            | 1.83  | 10 | -0.07               | 3.89              |
| 2-cell                   | 0.26                            | 0.06 | 1059 | 0.72                               | 0.34 | 679 | 0.36                                  | 0.10 | 1059 | 0.70                             | 0.29 | 679 | 11.14                            | 0.99 | 23 | 10.6             | 2.35  | 12 | -0.07               | 2.48              |
| 4-cell                   | 0.21                            | 0.05 | 625  | 0.66                               | 0.30 | 405 | 0.34                                  | 0.09 | 625  | 0.72                             | 0.29 | 405 | 9.08                             | 0.82 | 33 | 4.9              | 1.52  | 23 | -0.07               | 2.01              |
| 8-cell                   | 0.20                            | 0.04 | 909  | 0.59                               | 0.24 | 555 | 0.31                                  | 0.11 | 909  | 0.60                             | 0.26 | 555 | 6.86                             | 0.85 | 34 | 2.29             | 0.74  | 27 | -0.07               | 1.78              |
| 16-cell                  | 0.17                            | 0.05 | 422  | 0.65                               | 0.31 | 288 | 0.33                                  | 0.10 | 422  | 0.77                             | 0.29 | 288 | 5.44                             | 0.84 | 15 | 1.02             | 0.48  | 18 | -0.07               | 1.46              |
| <b><i>P. lividus</i></b> |                                 |      |      |                                    |      |     |                                       |      |      |                                  |      |     |                                  |      |    |                  |       |    |                     |                   |
|                          | Growth rate ( $\mu\text{m/s}$ ) |      |      | Shrinkage rate ( $\mu\text{m/s}$ ) |      |     | Catastrophe freq. ( $\text{s}^{-1}$ ) |      |      | Rescue freq. ( $\text{s}^{-1}$ ) |      |     | Spindle length ( $\mu\text{m}$ ) |      |    | Cell volume (pL) |       |    | <i>J</i>            | <L>               |
| stage                    | mean                            | SD   | N    | mean                               | SD   | N   | mean                                  | SD   | N    | mean                             | SD   | N   | mean                             | SD   | N  | mean             | SD    | N  | ( $\mu\text{m/s}$ ) | ( $\mu\text{m}$ ) |
| 1-cell                   | 0.25                            | 0.04 | 276  | 0.47                               | 0.19 | 104 | 0.14                                  | 0.04 | 276  | 0.23                             | 0.07 | 104 | 21.61                            | 2.02 | 13 | 438.81           | 65.0  | 13 | -0.01               | 15.01             |
| 2-cell                   | 0.23                            | 0.04 | 391  | 0.42                               | 0.18 | 189 | 0.14                                  | 0.04 | 391  | 0.22                             | 0.08 | 189 | 19.68                            | 2.02 | 9  | 201.19           | 22.38 | 9  | -0.02               | 10.24             |
| 4-cell                   | 0.18                            | 0.04 | 187  | 0.37                               | 0.09 | 103 | 0.15                                  | 0.04 | 187  | 0.24                             | 0.07 | 103 | 17.87                            | 2.77 | 7  | 80.1             | 25.05 | 7  | -0.03               | 5.02              |
| 8-cell                   | 0.15                            | 0.03 | 500  | 0.36                               | 0.11 | 276 | 0.13                                  | 0.03 | 500  | 0.23                             | 0.06 | 276 | 16.14                            | 2.05 | 17 | 48.77            | 18.73 | 17 | -0.03               | 3.95              |
| 16-cell                  | 0.13                            | 0.03 | 341  | 0.37                               | 0.12 | 189 | 0.13                                  | 0.03 | 341  | 0.24                             | 0.08 | 189 | 13.99                            | 3.92 | 7  | 15.74            | 16.39 | 7  | -0.03               | 3.04              |
| 16-cell $\mu$            | 0.11                            | 0.01 | 92   | 0.35                               | 0.07 | 72  | 0.12                                  | 0.03 | 92   | 0.26                             | 0.06 | 72  | 11.26                            | 0.76 | 5  | 4.91             | 0.66  | 5  | -0.03               | 2.3               |
| 32-cell                  | 0.11                            | 0.02 | 150  | 0.38                               | 0.15 | 55  | 0.12                                  | 0.03 | 150  | 0.26                             | 0.09 | 55  | 12.03                            | 1.75 | 9  | 9.28             | 6.38  | 9  | -0.04               | 2.42              |
| 44-64-cell               | 0.11                            | 0.02 | 97   | 0.35                               | 0.11 | 58  | 0.15                                  | 0.04 | 97   | 0.28                             | 0.09 | 58  | 10.05                            | 0.88 | 5  | 6.43             | 2.29  | 5  | -0.04               | 1.98              |

**B**

***C. elegans* and *P. lividus* cell and spindle dimensions**

| <b><i>C. elegans</i></b> |                                  |      |    |                                 |      |    |                                             |      |    |                                     |      |    |                                  |       |    |                  |       |    |  |
|--------------------------|----------------------------------|------|----|---------------------------------|------|----|---------------------------------------------|------|----|-------------------------------------|------|----|----------------------------------|-------|----|------------------|-------|----|--|
|                          | Spindle length ( $\mu\text{m}$ ) |      |    | Spindle width ( $\mu\text{m}$ ) |      |    | Metaphase plate thickness ( $\mu\text{m}$ ) |      |    | Centrosome radius ( $\mu\text{m}$ ) |      |    | Cell perimeter ( $\mu\text{m}$ ) |       |    | Cell volume (pL) |       |    |  |
| stage                    | mean                             | SD   | N  | mean                            | SD   | N  | mean                                        | SD   | N  | mean                                | SD   | N  | mean                             | SD    | N  | mean             | error | N  |  |
| 1-cell                   | 14.09                            | 0.79 | 24 | 5.96                            | 0.84 | 24 | 1.3                                         | 0.33 | 34 | 0.76                                | 0.14 | 35 | 135.73                           | 6.81  | 24 | 22.27            | 1.83  | 10 |  |
| 2-cell                   | 11.14                            | 0.99 | 23 | 5.35                            | 0.47 | 23 | 1.09                                        | 0.24 | 56 | 0.59                                | 0.13 | 63 | 94.62                            | 9.2   | 27 | 10.6             | 2.35  | 12 |  |
| 4-cell                   | 9.08                             | 0.82 | 33 | 5.64                            | 2.83 | 33 | 1.03                                        | 0.21 | 25 | 0.48                                | 0.08 | 37 | 68.89                            | 7.33  | 43 | 4.9              | 1.52  | 23 |  |
| 8-cell                   | 6.86                             | 0.85 | 34 | 3.99                            | 0.47 | 34 | 1.19                                        | 0.36 | 51 | 0.44                                | 0.08 | 47 | 48.69                            | 5.7   | 39 | 2.29             | 0.74  | 27 |  |
| 16-cell                  | 5.44                             | 0.84 | 15 | 3.21                            | 0.42 | 15 | 0.81                                        | 0.13 | 24 | 0.35                                | 0.06 | 36 | 34.26                            | 5.74  | 19 | 1.02             | 0.48  | 18 |  |
| <b><i>P. lividus</i></b> |                                  |      |    |                                 |      |    |                                             |      |    |                                     |      |    |                                  |       |    |                  |       |    |  |
|                          | Spindle length ( $\mu\text{m}$ ) |      |    | Spindle width ( $\mu\text{m}$ ) |      |    | Metaphase plate thickness ( $\mu\text{m}$ ) |      |    | Centrosome radius ( $\mu\text{m}$ ) |      |    | Cell perimeter ( $\mu\text{m}$ ) |       |    | Cell volume (pL) |       |    |  |
| stage                    | mean                             | SD   | N  | mean                            | SD   | N  | mean                                        | SD   | N  | mean                                | SD   | N  | mean                             | SD    | N  | mean             | error | N  |  |
| 1-cell                   | 21.61                            | 2.02 | 13 | 12.99                           | 1.11 | 13 | -                                           | -    | -  | 3.9                                 | 0.59 | 26 | 296.19                           | 14.62 | 13 | 438.81           | 65.0  | 13 |  |
| 2-cell                   | 19.68                            | 2.02 | 9  | 13.01                           | 1.4  | 9  | -                                           | -    | -  | 3.39                                | 0.5  | 18 | 228.39                           | 8.47  | 9  | 201.19           | 22.38 | 9  |  |
| 4-cell                   | 17.87                            | 2.77 | 7  | 13.13                           | 2.7  | 7  | -                                           | -    | -  | 1.95                                | 0.43 | 14 | 168.02                           | 17.51 | 7  | 80.1             | 25.05 | 7  |  |
| 8-cell                   | 16.14                            | 2.05 | 17 | 11.69                           | 2    | 17 | -                                           | -    | -  | 1.93                                | 0.33 | 34 | 142.41                           | 18.23 | 17 | 48.77            | 18.73 | 17 |  |
| 16-cell                  | 13.99                            | 3.92 | 7  | 10.03                           | 2.68 | 7  | -                                           | -    | -  | 1.6                                 | 0.37 | 14 | 97.67                            | 33.92 | 7  | 15.74            | 16.39 | 7  |  |
| 16-cell $\mu$            | 11.26                            | 0.76 | 5  | 9.74                            | 1.62 | 5  | -                                           | -    | -  | 1.19                                | 0.27 | 12 | 66.26                            | 2.96  | 5  | 4.91             | 0.66  | 5  |  |
| 32-cell                  | 12.03                            | 1.75 | 9  | 9.77                            | 1.39 | 9  | -                                           | -    | -  | 1.41                                | 0.31 | 18 | 81.91                            | 18.75 | 9  | 9.28             | 6.38  | 9  |  |
| 44-64-cell               | 10.05                            | 0.88 | 5  | 8.19                            | 1.45 | 5  | -                                           | -    | -  | 1.07                                | 0.36 | 10 | 72.49                            | 8.59  | 5  | 6.43             | 2.29  | 5  |  |

**Table S3. Parameters used in the simulations.  
Related to Figures 5 and S4**

| Parameter                    |                                                          | Description/reference                                                                                                                                                                                                                                                                                                                                                                                                                                                                                                                                                                      |
|------------------------------|----------------------------------------------------------|--------------------------------------------------------------------------------------------------------------------------------------------------------------------------------------------------------------------------------------------------------------------------------------------------------------------------------------------------------------------------------------------------------------------------------------------------------------------------------------------------------------------------------------------------------------------------------------------|
| <u>Microtubules (MTs)</u>    |                                                          |                                                                                                                                                                                                                                                                                                                                                                                                                                                                                                                                                                                            |
| Rigidity                     | 30 pN.μm <sup>2</sup>                                    | Corresponds to a persistence length of 7 μm (Gittes et al., 1993)                                                                                                                                                                                                                                                                                                                                                                                                                                                                                                                          |
| Growth rate (input)          | $V_0 = 0.14$ to $0.43$ μm/s                              | Varied in each simulation between 0.14 and 0.43 μm/s (range of experimental growth rate observed in <i>C. elegans</i> in this study)                                                                                                                                                                                                                                                                                                                                                                                                                                                       |
| Effective growth rate        | $V_g = V_0 \cdot \exp(-F/F_{\text{stall}})$              | Under antagonistic force (F) growth rate was reduced (Dogterom and Yurke 1997)                                                                                                                                                                                                                                                                                                                                                                                                                                                                                                             |
| Stall force                  | $F_{\text{stall}} = 5$ pN                                | From Dogterom and Yurke, 1997                                                                                                                                                                                                                                                                                                                                                                                                                                                                                                                                                              |
| Shrinkage rate               | 0.65 μm/s                                                | This study (average shrinkage rate of spindle MTs from 1- to 16-cell stage in <i>C. elegans</i> )                                                                                                                                                                                                                                                                                                                                                                                                                                                                                          |
| Rescue frequency             | 0.5 s <sup>-1</sup>                                      | This study (average rescue frequency of spindle MTs from 1- to 16-cell stage in <i>C. elegans</i> )                                                                                                                                                                                                                                                                                                                                                                                                                                                                                        |
| Catastrophe frequency (fc)   | $fc_0 = 0.3$ ; $fc_{\text{stall}} = 0.6$ s <sup>-1</sup> | $fc_0$ corresponds to the average catastrophe frequency of freely growing MTs (measured in this study). The catastrophe frequency of stalled MTs ( $fc_{\text{stall}}$ ) was estimated to be twice that of free MTs ( $2 \cdot fc_0$ ). In Cytosim catastrophe frequency can be increased with opposing force as described by Janson et al., 2003. Force-induced catastrophe was only considered in simulations using astral MTs confined in space (Figure 5A-C)<br>Catastrophe frequency is expressed in Cytosim as: $fc = fc_{\text{stall}} / (1 + (fc_{\text{stall}}/fc_0 - 1)V_g/V_0)$ |
| <u>MT nucleation</u>         |                                                          |                                                                                                                                                                                                                                                                                                                                                                                                                                                                                                                                                                                            |
|                              |                                                          | MTs were only nucleated at centrosomes, the number of MTs per aster was constant                                                                                                                                                                                                                                                                                                                                                                                                                                                                                                           |
| <u>Centrosomes</u>           |                                                          |                                                                                                                                                                                                                                                                                                                                                                                                                                                                                                                                                                                            |
| Viscosity                    | 200 pN.s/μm <sup>2</sup>                                 | From Letort et al., 2016. In Cytosim the mobility of the beads used to mimic centrosomes is dependent on its effective viscosity (200 pN.s/μm <sup>2</sup> ). This does not influence MT mobility                                                                                                                                                                                                                                                                                                                                                                                          |
| Radius                       | 0.5 μm                                                   | Average radius measured in this study                                                                                                                                                                                                                                                                                                                                                                                                                                                                                                                                                      |
| Fibers                       | 50 or 500 MTs per aster                                  | 50 MTs when only spindle MTs were simulated. 500 MTs including 100 constrained spindle MTs when astral MTs were simulated                                                                                                                                                                                                                                                                                                                                                                                                                                                                  |
| Spindle angle                | 0.6 rad                                                  | Constrains spindle MTs into a right circular cone with a semi-angle of ~30°. This angle was estimated from our measurements of spindle geometry (Table S2)                                                                                                                                                                                                                                                                                                                                                                                                                                 |
| <u>Metaphase plate</u>       |                                                          |                                                                                                                                                                                                                                                                                                                                                                                                                                                                                                                                                                                            |
| Shape and dimensions         | Solid cylinder                                           | Cylinder dimensions varied in each simulation and were extrapolated from experimental data (Table S2). MTs were confined outside the plate                                                                                                                                                                                                                                                                                                                                                                                                                                                 |
| Couple                       |                                                          | Couples are made of two singles called « hands » and link MTs to metaphase plate                                                                                                                                                                                                                                                                                                                                                                                                                                                                                                           |
| Hand1                        | Hands binding to plate                                   | Anchored to the metaphase plate. Avoid MT sliding away when attached to the plate                                                                                                                                                                                                                                                                                                                                                                                                                                                                                                          |
| Hand2                        | Hands binding to MTs                                     | Bind only free growing MTs with very high binding rate                                                                                                                                                                                                                                                                                                                                                                                                                                                                                                                                     |
| <u>Confinement space</u>     |                                                          |                                                                                                                                                                                                                                                                                                                                                                                                                                                                                                                                                                                            |
| Cell space                   | unconfined or 3D ellipse                                 | Dimensions of the ellipse were extrapolated from <i>C. elegans</i> embryo dimensions. In simulations with astral MTs, all objects were confined within the ellipse (Figure 5A-C).                                                                                                                                                                                                                                                                                                                                                                                                          |
| <u>Simulation parameters</u> |                                                          |                                                                                                                                                                                                                                                                                                                                                                                                                                                                                                                                                                                            |
| Time step                    | 0.05 s                                                   | Nédélec et al., 2007                                                                                                                                                                                                                                                                                                                                                                                                                                                                                                                                                                       |
| kT                           | 0.0042 pN.μm                                             | Corresponds to a temperature of 25°C                                                                                                                                                                                                                                                                                                                                                                                                                                                                                                                                                       |
| Viscosity                    | 1 pN.s/μm <sup>2</sup>                                   | Cytoplasmic viscosity. Kole et al., 2005; Nedelec and Foethke, 2007; Letort et al., 2016                                                                                                                                                                                                                                                                                                                                                                                                                                                                                                   |
